# Supplementary material for: Anti-Inflammatory and Anti-Hyperuricemic Effects of Chrysin on a High Fructose Corn Syrup-Induced Hyperuricemia Rat Model via the Amelioration of Urate Transporters and Inhibition of NLRP3 Inflammasome Signaling Pathway
Source: MDPI journal article supplement (doi:10.3390/antiox10040564), 2021-04-06
Supplement: s1 [file s1]

# Anti-Inflammatory and Anti-Hyperuricemia Effects of Chrysin on High Fructose Corn Syrup-Induced Hyperuricemia Rats via Ameliorates of Urate Transporters and the Inhibition of NLRP3 Inflammasome Signaling Pathway

Yi-Hsien Chang<sup>1</sup>, Yi-Fen Chiang<sup>2†</sup>, Hsin-Yuan Chen<sup>2,4</sup>, Yun-Ju Huang<sup>2</sup>, Kai-Lee Wang<sup>3</sup>,

Yong-Han Hong<sup>4</sup>, Mohamed Ali<sup>5</sup>, Tzong-Ming Shieh<sup>6</sup>, Shih-Min Hsia<sup>1,2,6,7\*</sup>

<sup>1</sup> Graduate Institute of Metabolism and Obesity Sciences, College of Nutrition, Taipei Medical University, Taipei, Taiwan; peggy4103@gmail.com (Y.-S.C.)

<sup>2</sup> School of Nutrition and Health Sciences, College of Nutrition, Taipei Medical University, Taipei 11031, Taiwan; yvonne840828@gmail.com (Y.-F.C.); hsin246@gmail.com (H.-Y.C.); d04641004@ntu.edu.tw (Y.-J.H.);

<sup>3</sup> Department of Nursing, Ching Kuo Institute of Management and Health, Keelung 20301, Taiwan; kellywang@tmu.edu.tw

<sup>4</sup> Department of Nutrition, I-Shou University, Kaohsiung 84001, Taiwan; hsin246@gmail.com (H.-Y.C.); yonghan@isu.edu.tw (Y.-H. H)

<sup>5</sup> Clinical Pharmacy Department, Faculty of Pharmacy, Ain Shams University, 11566 Cairo, Egypt; mohamed.aboouf@pharma.asu.edu.eg (M.A.)

<sup>6</sup> School of Dentistry, College of Dentistry, China Medical University, Taichung 40402, Taiwan.; tmshieh@mail.cmu.edu.tw (T.-M.S.)

<sup>7</sup> School of Food and Safety, Taipei Medical University, Taipei 11031, Taiwan

<sup>8</sup> Nutrition Research Center, Taipei Medical University Hospital, Taipei 11031, Taiwan

\* Correspondence: [bryanhsia@tmu.edu.tw](mailto:bryanhsia@tmu.edu.tw) (S.-M.H.); Tel.: +886-273-61661-6558

† Equal contribution.

## Supplementary Table 1.

### Effects of chrysin on tissue weights, and tissue index in HFCS induced hyperuricemic rats

| Group   | Kidney weight(g) | Kidney index(%) | Liver weight(g) | Liver index(%) |
|---------|------------------|-----------------|-----------------|----------------|
| Control | 4.18±0.56        | 0.82±0.08       | 15.67±2.42      | 3.05±0.26      |
| HFCS    | 4.27±0.40        | 0.81±0.06       | 19.22±3.73      | 3.62±0.45      |
| CH 50   | 4.58±0.47        | 0.91±0.06       | 18.13±1.84      | 3.54±0.34      |
| CH 100  | 4.31±0.32        | 0.90±0.09       | 17.34±1.62      | 3.52±0.29      |
| CH 150  | 4.25±0.21        | 0.87±0.06       | 17.52±2.84      | 3.34±0.26      |
| AP      | 4.71±0.34        | 0.82±0.05       | 18.40±2.47      | 3.53±0.41      |

Tissue index (%) = (tissue weight / body weight) × 100

Data are means ± S.E.M. (n=8-9 per group). HFCS, high-fructose corn syrup group (10 % high-fructose corn syrup solution); AP, positive control group (Allopurinol: 10 mg/kg BW); CH 50: chrysin (50 mg/kg BW); CH 100: chrysin (100 mg/kg BW); CH 150: chrysin (150 mg/kg BW).

## Supplementary Figure 1.

Effects of chrysin on kidney histology in HFCS induced hyperuricemic rats

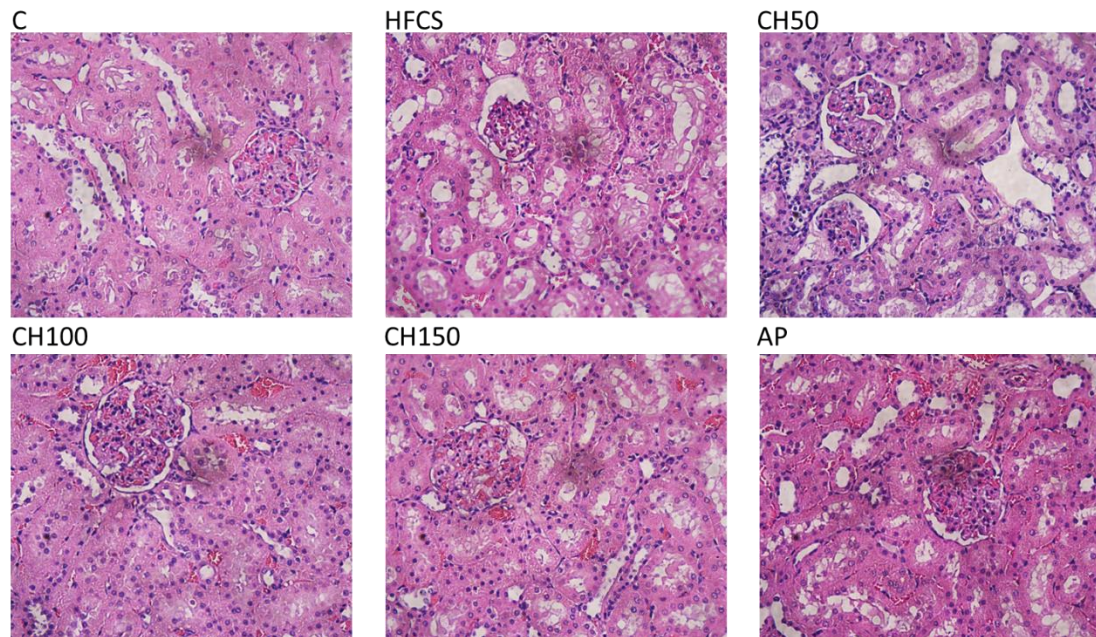

Representative images of kidney H&E staining.

Data are means  $\pm$  S.E.M. (n=8-9 per group). HFCS, high-fructose corn syrup group (10 % high-fructose corn syrup solution); AP, positive control group (Allopurinol: 10 mg/kg BW); CH 50: chrysin (50 mg/kg BW); CH 100: chrysin (100 mg/kg BW); CH 150: chrysin (150 mg/kg BW).
